# Supplementary material
Source: publisher figshare collection journal article supplement (https://diabetesjournals.figshare.com/articles/dataset/_/13562354)
Supplement: Supplementary file 2 [file 1]

## Checklist for Reporting Human Islet Preparations Used in Research

Adapted from Hart NJ, Powers AC (2018) Progress, challenges, and suggestions for using human islets to understand islet biology and human diabetes. *Diabetologia* <https://doi.org/10.1007/s00125-018-4772-2>.

|                                                                                                                                                                                                                                                                |                                                    |
|----------------------------------------------------------------------------------------------------------------------------------------------------------------------------------------------------------------------------------------------------------------|----------------------------------------------------|
| <b>Manuscript DOI:</b> <a href="https://doi.org/10.2337/[insert manuscript submission number]">https://doi.org/10.2337/[insert manuscript submission number]</a> (Example, <a href="https://doi.org/10.2337/db18-1234">https://doi.org/10.2337/db18-1234</a> ) |                                                    |
| <b>Title:</b> Dynamic uni- and multicellular patterns encode biphasic activity in pancreatic islets                                                                                                                                                            |                                                    |
| <b>Author list:</b> Manon Jaffredo, Eléonore Bertin, Antoine Pirog, Sandra Oucherif, Fanny Lebreton, Domenico Bosco, Bogdan Catargi, Daniel Cattaert, Sylvie Renaud, Jochen Lang, Matthieu Raoux                                                               |                                                    |
| <b>Corresponding author:</b> Matthieu Raoux                                                                                                                                                                                                                    | <b>Email address:</b> matthieu.raoux@u-bordeaux.fr |

| Islet preparation              | 1     | 2     |
|--------------------------------|-------|-------|
| <b>MANDATORY INFORMATION</b>   |       |       |
| Unique identifier              | P1009 | P1107 |
| Donor age (years)              | 38    | 55    |
| Donor sex (M/F)                | F     | F     |
| Donor BMI (kg/m <sup>2</sup> ) | 25.2  | 23.2  |

|                                                                   |                                    |                                    |
|-------------------------------------------------------------------|------------------------------------|------------------------------------|
| Donor HbA <sub>1c</sub> or other measure of blood glucose control | Glycemia at pancreatectomy: 7.7 mM | Glycemia at pancreatectomy: 8.4 mM |
| Origin/source of islets <sup>b</sup>                              | ECIT                               | ISLETCHIP                          |
| Islet isolation centre                                            | Geneva (CMU)                       | Geneva (CMU)                       |
| Donor history of diabetes? Yes/No                                 | No                                 | No                                 |
| Diabetes duration (years)                                         | 0                                  | 0                                  |
| Glucose-lowering therapy at time of death <sup>c</sup>            | None                               | None                               |

| Islet preparation              | 1                    | 2                    |
|--------------------------------|----------------------|----------------------|
| <b>RECOMMENDED INFORMATION</b> |                      |                      |
| Donor cause of death           | Cerebral Haemorrhage | Cerebral Haemorrhage |
| Warm ischaemia time (h)        | 0.83                 | 0.98                 |
| Cold ischaemia time (h)        | 4.03                 | 3.97                 |

|                                                                                   |     |                                                                                                                                                                                                                                                                               |
|-----------------------------------------------------------------------------------|-----|-------------------------------------------------------------------------------------------------------------------------------------------------------------------------------------------------------------------------------------------------------------------------------|
| Estimated purity (%)                                                              | 90  | 92                                                                                                                                                                                                                                                                            |
| Estimated viability (%)                                                           | N/A | 85                                                                                                                                                                                                                                                                            |
| Total culture time (h) <sup>d</sup>                                               | N/A | N/A                                                                                                                                                                                                                                                                           |
| Glucose-stimulated insulin secretion or other functional measurement <sup>e</sup> | N/A | GSIS static incubation (means±SD)<br>% insulin secreted in G2.8: 0.8±0.1%<br>% insulin secreted in G16.7: 1.9±0.5%<br>% insulin secreted in G16.7mM + 5 mM theophyllin: 6.9±1.9%<br>Stimulation index G16.7 vs G2.8: 2.5±0.7<br>Stimulation index G16.7+theo vs G2.8: 8.9±2.8 |
| Handpicked to purity?<br>Yes/No                                                   | No  | No                                                                                                                                                                                                                                                                            |
| Additional notes                                                                  |     |                                                                                                                                                                                                                                                                               |

<sup>a</sup>If you have used more than eight islet preparations, please complete additional forms as necessary

<sup>b</sup>For example, IIDP, ECIT, Alberta IsletCore

<sup>c</sup>Please specify the therapy/therapies

<sup>d</sup>Time of islet culture at the isolation centre, during shipment and at the receiving laboratory

<sup>e</sup>Please specify the test and the results
